# Supplementary material for: CBD2: A functional biomarker database for colorectal cancer
Source: PubMed Central journal article supplement (PMC10989088; doi:10.1002/imt2.155), 2023-12-04
Supplement: IMT2-3-e155-s002.pdf [file IMT2-3-e155-s002.pdf]

# How to Use

## How to Search

We offer users three different ways to retrieve data: Categorical Search, Keyword Search, and Advanced Search. Each search strategy returns results with detailed information about the corresponding biomarker.

### Categorical Search

Users can access biomarker data through the menu on the left side of the "Biomarkers" page. There are currently four major categories: Protein, RNA, DNA and Other, and clicking on a menu item will display a list of all the corresponding biomarkers on the right side. If there is a subcategory under a major category, the relevant submenu will appear when the user clicks on the menu item. Once the user clicks on one of the markers in the biomarker list, the interface will jump to the information page. (Figure 1)

| ID | BIOMARKER                                 | LOCATION      | APPLICATION | REFERENCE                                   |
|----|-------------------------------------------|---------------|-------------|---------------------------------------------|
| 1  | P53                                       | Colon, Rectum | Prognosis   | Yamaguchi A et al. Cancer. 1992             |
| 2  | MYC-1                                     | Colon, Rectum | Prognosis   | Yamaguchi A et al. Oncology. 1992           |
| 3  | CA242                                     | Colon, Rectum | Diagnosis   | Nilsson O et al. Br J Cancer. 1992          |
| 4  | Sialosyl-Tn                               | Colon         | Prognosis   | Itzkowitz SH et al. Cancer. 1990            |
| 5  | Carcinoembryonic antigen (CEA)            | Colon, Rectum | Prognosis   | Davey P et al. Eur J Surg Oncol. 1987       |
| 6  | Sialomucin                                | Colon, Rectum | Prognosis   | Dawson PM et al. Int Surg. 1987             |
| 7  | Alkaline phosphatase (AP)                 | Colon, Rectum | Prognosis   | Abdo K et al. Eur J Cancer Clin Oncol. 1986 |
| 8  | Tissue polypeptide-specific antigen (TPS) | Colon, Rectum | Diagnosis   | Kornek G et al. Br J Cancer. 1985           |
| 9  | Carcinoembryonic                          | Colon, Rectum | Prognosis   | Miles WF et al. Br J Gen                    |

| ITEM         | DETAIL                                                                                                                                                                                                                          |
|--------------|---------------------------------------------------------------------------------------------------------------------------------------------------------------------------------------------------------------------------------|
| ID           | 1                                                                                                                                                                                                                               |
| Biomarker    | P53                                                                                                                                                                                                                             |
| Category     | Protein                                                                                                                                                                                                                         |
| NCBI Protein | P11512 (P53_HUMAN)                                                                                                                                                                                                              |
| Description  | The p53 gene is located on chromosome 17 and encodes for a 393 amino acid protein.                                                                                                                                              |
| Region       | Introns: 8; Exons: 9                                                                                                                                                                                                            |
| Size         | 393                                                                                                                                                                                                                             |
| Number       | 110                                                                                                                                                                                                                             |
| Gender       | NA                                                                                                                                                                                                                              |
| Age          | NA                                                                                                                                                                                                                              |
| Location     | Colon, Rectum                                                                                                                                                                                                                   |
| Stage        | NA                                                                                                                                                                                                                              |
| Source       | Tissue                                                                                                                                                                                                                          |
| Experiment   | Immunohistochemistry                                                                                                                                                                                                            |
| Statistics   | The 3-year survival rate was 76.7% of 39 patients with p53 negative tumours and 41.9% for the patients with p53 positive tumours. There was a significant difference in the rate between the two groups of patients (P < 0.05). |
| Application  | Prognosis                                                                                                                                                                                                                       |
| Conclusion   | These results suggest that the immunoreactivity of p53 may be a biologic marker of prognostic significance.                                                                                                                     |
| Reference    | Yamaguchi A et al. Cancer. 1992                                                                                                                                                                                                 |
| PMID         | 1401000 (Cite to PubMed)                                                                                                                                                                                                        |
| STRING Name  | P53                                                                                                                                                                                                                             |
| STRING ID    | <input type="button" value="SHOW STRING ID"/>                                                                                                                                                                                   |

Figure 1. Search by category

### Keyword Search

The second way to search the users needed marker is the key word search: input a biomarker name and then click the "search" button. It will turn to a result page including the relevant biomarker's information. (Figure 2)

The search result for the key word "p53"

| ID  | BIOMARKER   | CATEGORY | LOCATION      | APPLICATION          | REFERENCE                                      |
|-----|-------------|----------|---------------|----------------------|------------------------------------------------|
| 1   | PS3         | Protein  | Colon, Rectum | Prognosis            | Yamaguchi A et al. <i>Cancer</i> . 1992        |
| 19  | PS3         | Protein  | Colon, Rectum | Prognosis            | Zeng ZS et al. <i>J Clin Oncol</i> . 1994      |
| 31  | PS3         | Protein  | Colon, Rectum | Prognosis            | Yamaguchi A et al. <i>Br J Cancer</i> . 1993   |
| 42  | PS3         | Protein  | Colon, Rectum | Prognosis            | Rehner C et al. <i>J Clin Oncol</i> . 1996     |
| 49  | TP53, K-ras | Protein  | Colon, Rectum | Prognosis            | Hordrigham JE et al. <i>Gut</i> . 1998         |
| 78  | PS3         | Protein  | Colon, Rectum | Prognosis            | Nishi D et al. <i>Eur J Cancer</i> . 1998      |
| 98  | PS3         | Protein  | Rectum        | Treatment            | Adell G et al. <i>Radiother Oncol</i> . 1999   |
| 107 | PS3, Scl-2  | Protein  | Rectum        | Prognosis            | Schwartzel D et al. <i>Eur J Cancer</i> . 2000 |
| 114 | PS3         | Protein  | Colon, Rectum | Prognosis, Treatment | Suzumura H et al. <i>Eur J Cancer</i> . 2000   |

The detail information of "PS3"

| ITEMS        | DETAIL                                                                                                                                                                                                                             |
|--------------|------------------------------------------------------------------------------------------------------------------------------------------------------------------------------------------------------------------------------------|
| ID           | 1                                                                                                                                                                                                                                  |
| Biomarker    | PS3                                                                                                                                                                                                                                |
| Category     | Protein                                                                                                                                                                                                                            |
| NCBI Protein | TP53 (Click to NCBI Protein)                                                                                                                                                                                                       |
| Description  | The p53 gene is located on chromosome 17p and encodes for a 53kD nuclear phosphoprotein.                                                                                                                                           |
| Region       | Shikoku, Japan, Asia                                                                                                                                                                                                               |
| Race         | Asian                                                                                                                                                                                                                              |
| Number       | 100                                                                                                                                                                                                                                |
| Gender       | NA                                                                                                                                                                                                                                 |
| Age          | NA                                                                                                                                                                                                                                 |
| Location     | Colon, Rectum                                                                                                                                                                                                                      |
| Stage        | NA                                                                                                                                                                                                                                 |
| Source       | Tissue                                                                                                                                                                                                                             |
| Experiment   | Immunohistochemistry                                                                                                                                                                                                               |
| Statistics   | The 3 year survival rate was 96.78% of 39 patients with p53-negative carcinomas and 61.8% for the patients with p53 positive tumors; there was a significant difference in the rate between the two groups of patients (P < 0.05). |
| Application  | Prognosis                                                                                                                                                                                                                          |
| Conclusion   | These results suggest that the immunoreactivity of p53 may be a biologic marker of prognostic significance.                                                                                                                        |
| Reference    | Yamaguchi A et al. <i>Cancer</i> . 1992                                                                                                                                                                                            |
| PMID         | 1431555 (Click to PubMed)                                                                                                                                                                                                          |
| STRING Name  | TP53                                                                                                                                                                                                                               |
| STRING PPI   | <input type="button" value="SHOW STRING PPI"/>                                                                                                                                                                                     |

Figure 2. Search by key word

## Advanced Search

Besides upon two ways, our database also provides the advanced search function: after click the "Advanced Search" button, an advanced search interface will appear. Six keywords are currently supported including region of study (Region), cancer stage (Stage), major cancer area (Location), marker source (Source), marker usage (Application), and information of published literature (Reference). (Figure 3)

### Advanced Search

Please fill out at least one item.

Region :

Stage :

Location :

Source :

Application :

Reference (First Author) :

Reference (Journal) :

Reference (Year) :

SEARCH

CBD:

Colorectal Cancer Biomarker Database

Home
Biomarkers
Submission
Download
Explore
About

#### The search result for Advanced Search

4 Biomarkers

| ID  | BIOMARKER                            | CATEGORY | REGION                    | LOCATION      | STAGE | SOURCE | APPLICATION | REFERENCE                                       |
|-----|--------------------------------------|----------|---------------------------|---------------|-------|--------|-------------|-------------------------------------------------|
| 109 | Anti-survivin antibodies             | Protein  | Dresden, Germany, Europe  | Colon, Rectum | NA    | Tissue | Diagnosis   | Rohayem J et al. Cancer Res. 2000               |
| 118 | Insulin-like growth factor I (IGF-I) | Protein  | Manchester, UK, Europe    | Colon, Rectum | NA    | Tissue | Diagnosis   | Renehan AG et al. J Clin Endocrinol Metab. 2000 |
| 120 | Endothelin-1 (ET-1)                  | Protein  | Leicester, UK, Europe     | Colon, Rectum | NA    | Blood  | Diagnosis   | Simpson RA et al. Br J Surg. 2000               |
| 124 | Interleukin-12 (IL-12)               | Other    | Kita-kyushyu, Japan, Asia | Colon, Rectum | NA    | Blood  | Diagnosis   | Nakayama Y et al. Anticancer Res. 2000          |

Figure 3. Advanced Search

## How to Explore

## Network Display

Figure 4 below is our "Explore" page.

The Explore page is designed to allow the user to select or enter any biomarker (or other proteins) of interest to obtain a network of interactions between them and to allow the user to query the network for relevant information such as topological parameters, enrichment information, etc. The available parameters are already listed on the left side.

In addition, if you enter only one protein, you will obtain its interaction with 10 other proteins (based on STRING scores). Here is an example for input protein "TP53":

Figure 4. Explore page

The left area of the page provides biomarker input and parameter selection. Users can select or input biomarkers of interest in three ways: 1) directly select the biomarkers stored in CBD2 2) upload txt or csv files 3) Type directly in the text box. After clicking the "Submit" button, the resulting network will be displayed on the upper right. Note that if only one protein is queried, the results will by default show the 10 other proteins whose network interacts with the highest confidence, we have set the default query to TP53. (Figure 5)

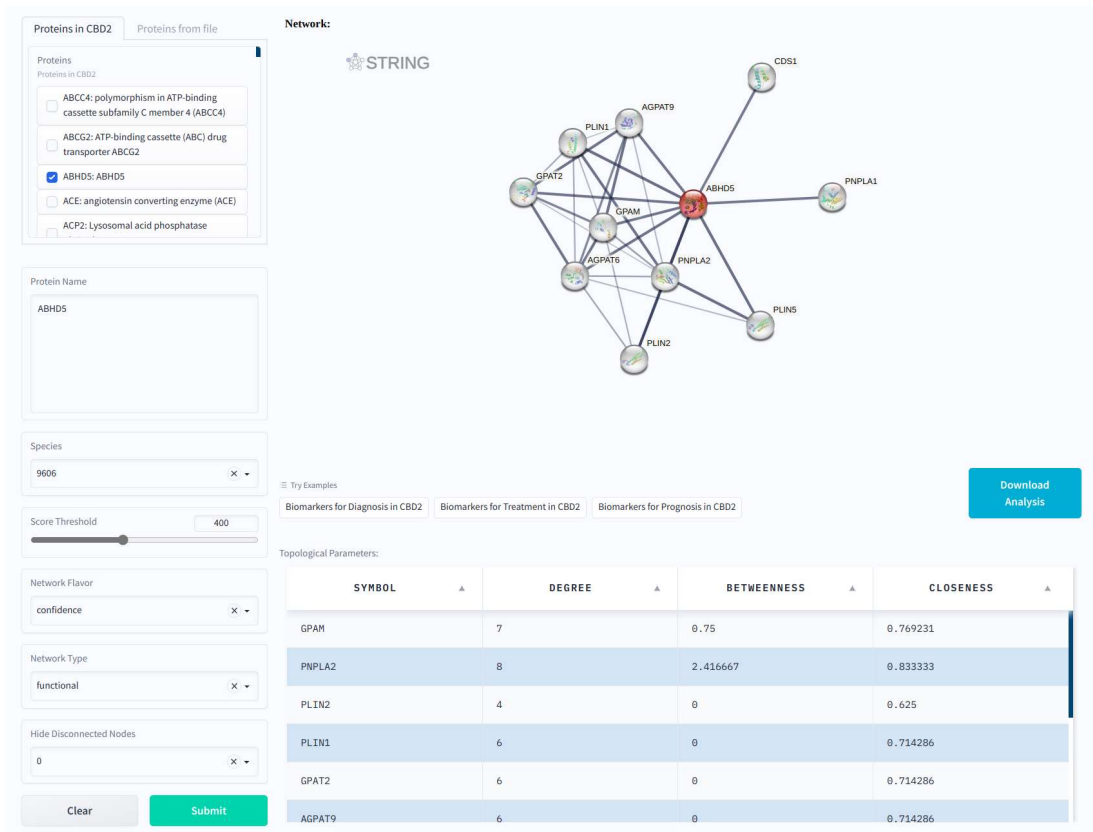

Figure 5. Network display

## Network Analysis

At the same time, after the user clicks the "Submit" button, we will also return the list of network parameters and the list of enrichment analysis. By clicking the result entry id of the enrichment analysis, the user can jump to the result page of the corresponding database. (Figure 6)

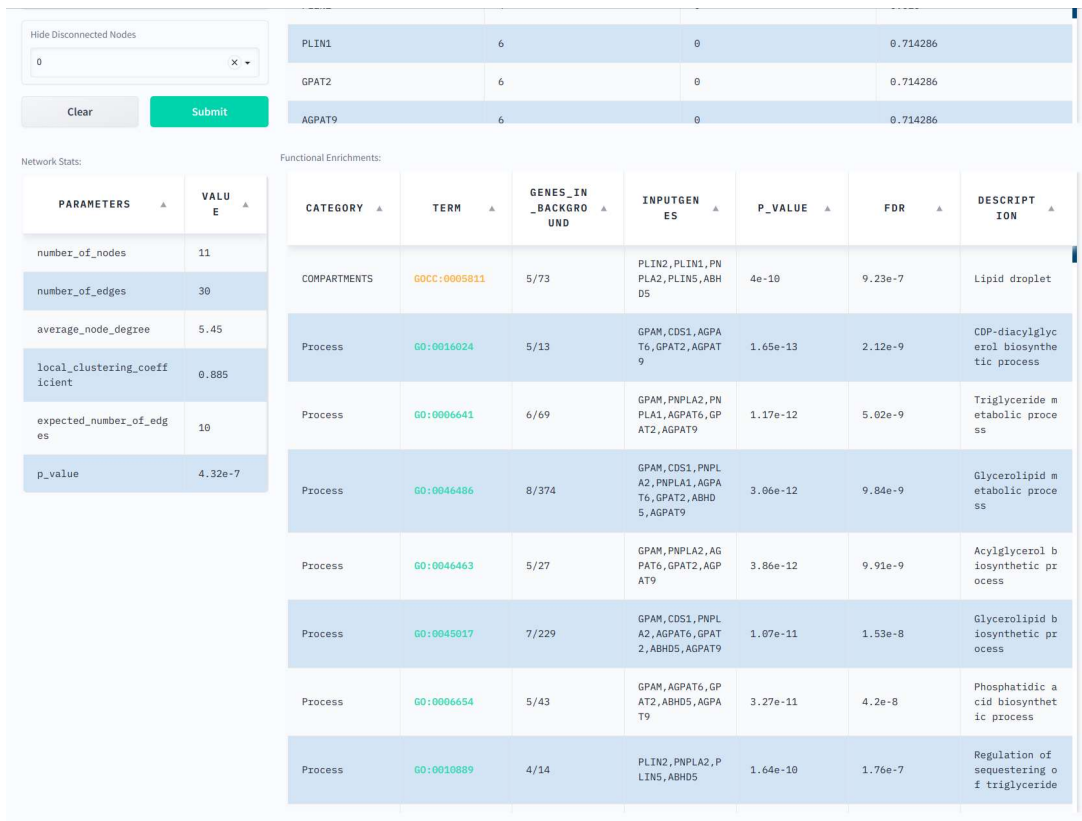

Figure 5. Network analysis

## Download

The network image and network parameters could be downloaded by clicking the "Download" button.

< PREVIOUS

Items in CBD

NEXT >

FAQ

Copyright © 2018-2022 Colorectal Cancer Biomarker Database (CBD), Linköping University, Soochow University, Guangdong Provincial People's Hospital.

All Rights Reserved. Published with [docsify](#).
